# Supplementary material
Source: MDPI journal article supplement (https://www.mdpi.com/2073-4352/11/9/1041)
Supplement: s1 [file s1]

# X-ray Single Crystal Structure, Tautomerism Aspect, DFT, NBO, and Hirshfeld Surface Analysis of a New Schiff Bases Based on 4-Amino-5-Indol-2-yl-1,2,4-Triazole-3-Thione Hybrid

Ahmed T. A. Boraei<sup>1,\*</sup>, Saied M. Soliman<sup>2</sup>, Matti Haukka<sup>3</sup>, El Sayed H. El Tamany<sup>1</sup>,  
Abdullah Mohammed Al-Majid<sup>4</sup> and Assem Barakat<sup>4,\*</sup>

<sup>1</sup> Chemistry Department, Faculty of Science, Suez Canal University, Ismailia 41522, Egypt; s.eltamany51@yahoo.com

<sup>2</sup> Department of Chemistry, Faculty of Science, Alexandria University, P.O. Box 426, Ibrahimia, Alexandria 21321, Egypt; saeed.soliman@alexu.edu.eg

<sup>3</sup> Department of Chemistry, University of Jyväskylä, P.O. Box 35, FI-40014 Jyväskylä, Finland; matti.o.haukka@jyu.fi

<sup>4</sup> Department of Chemistry, College of Science, King Saud University, P.O. Box 2455, Riyadh 11451, Saudi Arabia; amajid@ksu.edu.sa

\* Correspondence: ahmed\_boraei@science.suez.edu.eg (A.T.A.B.); amarakat@ksu.edu.sa (A.B.); Tel.: +966-11467-5901 (A.B.); Fax: +966-11467-5992 (A.B.)

## X-Ray Structure Determinations

The crystal of **3** and **4** were immersed in cryo-oil, mounted in a loop, and measured at a temperature of 120 K. The X-ray diffraction data were collected on a Rigaku Oxford Diffraction Supernova diffractometer using Cu K $\alpha$  radiation. The data sets were collected by  $\phi$  and  $\omega$  omega scans with  $\kappa$ -offset on a  $\kappa$ -geometry goniometer using micro-focus sealed X-ray tube and Atlas area detector. The *CrysAlisPr* [1] software package was used for cell refinements and data reductions. A Gaussian **3**) or a multi-scan **4** absorption correction (*CrysAlisPro* [1]) was applied to the intensities before structure solution. The structure was solved by intrinsic phasing (SHELXT [2]) method. Structural refinements were carried out using *SHELXL* [3] software with SHELXLE [4] graphical user interface. In **3**, the NH and OH hydrogen atoms were located from the difference Fourier map but constrained to ride on their parent atoms with  $U_{\text{iso}} = 1.5 U_{\text{eq}}(\text{parent atom})$ . In **4**, the NH hydrogen atoms were located from the difference Fourier map and refined isotropically. All other hydrogen atoms were positioned geometrically and constrained to ride on their parent atoms, with C–H = 0.95–0.98 Å and  $U_{\text{iso}} = 1.2\text{--}1.5 \cdot U_{\text{eq}}(\text{parent atom})$ .

**Table S1.** The calculated geometric parameters of **3** and **4**.

| Parameter | Calc  | Exp   | Err. <sup>b</sup> | %Err. <sup>c</sup> | Parameter | Calc  | Exp   | Err. <sup>b</sup> | %Err. <sup>c</sup> |
|-----------|-------|-------|-------------------|--------------------|-----------|-------|-------|-------------------|--------------------|
| <b>3</b>  |       |       |                   |                    | <b>4</b>  |       |       |                   |                    |
| R(1-14)   | 1.907 | 1.905 | 0.00              | 0.10               | R(1-9)    | 1.755 | 1.736 | 0.02              | 1.09               |
| R(2-22)   | 1.673 | 1.685 | -0.01             | -0.71              | R(2-12)   | 1.751 | 1.735 | 0.02              | 0.92               |
| R(3-4)    | 1.377 | 1.387 | -0.01             | -0.72              | R(3-20)   | 1.671 | 1.676 | 0.00              | -0.30              |
| R(3-20)   | 1.289 | 1.276 | 0.01              | 1.02               | R(4-5)    | 1.373 | 1.387 | -0.01             | -1.01              |
| R(4-22)   | 1.404 | 1.386 | 0.02              | 1.30               | R(4-18)   | 1.289 | 1.264 | 0.02              | 1.98               |
| R(4-23)   | 1.394 | 1.388 | 0.01              | 0.43               | R(5-20)   | 1.405 | 1.388 | 0.02              | 1.22               |
| R(5-7)    | 1.364 | 1.377 | -0.01             | -0.94              | R(5-21)   | 1.395 | 1.384 | 0.01              | 0.79               |
| R(5-22)   | 1.358 | 1.331 | 0.027             | 2.03               | R(6-7)    | 1.364 | 1.374 | -0.01             | -0.73              |
| R(7-23)   | 1.312 | 1.298 | 0.01              | 1.08               | R(6-20)   | 1.358 | 1.339 | 0.019             | 1.42               |
| R(8-24)   | 1.389 | 1.376 | 0.01              | 0.94               | R(7-21)   | 1.311 | 1.308 | 0.00              | 0.23               |

|             |       |       |       |       |             |       |       |       |       |
|-------------|-------|-------|-------|-------|-------------|-------|-------|-------|-------|
| R(8-36)     | 1.373 | 1.366 | 0.01  | 0.51  | R(8-22)     | 1.389 | 1.384 | 0.01  | 0.36  |
| R(10-12)    | 1.389 | 1.374 | 0.01  | 1.09  | R(8-34)     | 1.373 | 1.371 | 0.00  | 0.15  |
| R(10-19)    | 1.407 | 1.402 | 0.01  | 0.36  | R(9-10)     | 1.394 | 1.381 | 0.01  | 0.94  |
| R(12-14)    | 1.398 | 1.395 | 0.00  | 0.22  | R(9-17)     | 1.408 | 1.399 | 0.01  | 0.64  |
| R(14-15)    | 1.393 | 1.375 | 0.02  | 1.31  | R(10-12)    | 1.392 | 1.385 | 0.01  | 0.51  |
| R(15-17)    | 1.393 | 1.397 | 0.00  | -0.29 | R(12-13)    | 1.397 | 1.386 | 0.01  | 0.79  |
| R(17-19)    | 1.404 | 1.395 | 0.01  | 0.65  | R(13-15)    | 1.387 | 1.380 | 0.01  | 0.51  |
| R(19-20)    | 1.464 | 1.454 | 0.01  | 0.69  | R(15-17)    | 1.408 | 1.402 | 0.01  | 0.43  |
| R(23-24)    | 1.445 | 1.455 | -0.01 | -0.69 | R(17-18)    | 1.466 | 1.463 | 0.00  | 0.21  |
| R(24-25)    | 1.381 | 1.370 | 0.01  | 0.80  | R(21-22)    | 1.445 | 1.450 | 0.00  | -0.34 |
| R(25-27)    | 1.430 | 1.423 | 0.01  | 0.49  | R(22-23)    | 1.381 | 1.372 | 0.01  | 0.66  |
| R(27-28)    | 1.408 | 1.413 | -0.01 | -0.35 | R(23-25)    | 1.430 | 1.428 | 0.00  | 0.14  |
| R(27-36)    | 1.425 | 1.418 | 0.01  | 0.49  | R(25-26)    | 1.408 | 1.410 | 0.00  | -0.14 |
| R(28-30)    | 1.386 | 1.383 | 0.00  | 0.22  | R(25-34)    | 1.425 | 1.410 | 0.02  | 1.06  |
| R(30-32)    | 1.413 | 1.407 | 0.01  | 0.43  | R(26-28)    | 1.386 | 1.380 | 0.01  | 0.43  |
| R(32-34)    | 1.388 | 1.375 | 0.01  | 0.95  | R(28-30)    | 1.413 | 1.403 | 0.01  | 0.71  |
| R(34-36)    | 1.400 | 1.403 | 0.00  | -0.21 | R(30-32)    | 1.388 | 1.384 | 0.00  | 0.29  |
|             |       |       |       |       | R(32-34)    | 1.400 | 1.397 | 0.00  | 0.21  |
| A(1-14-12)  | 119.3 | 118.1 | 1.20  | 1.02  | A(1-9-10)   | 117.3 | 117.4 | -0.10 | -0.09 |
| A(1-14-15)  | 119.4 | 119.3 | 0.10  | 0.08  | A(1-9-17)   | 121.0 | 120.5 | 0.50  | 0.41  |
| A(2-22-4)   | 132.1 | 128.3 | 3.80  | 2.96  | A(2-12-10)  | 119.1 | 118.3 | 0.80  | 0.68  |
| A(2-22-5)   | 126.3 | 128.9 | -2.60 | -2.02 | A(2-12-13)  | 119.6 | 119.4 | 0.20  | 0.17  |
| A(4-3-20)   | 119.0 | 115.3 | 3.70  | 3.21  | A(3-20-5)   | 131.9 | 131.1 | 0.80  | 0.61  |
| A(3-4-22)   | 131.2 | 128.0 | 3.20  | 2.50  | A(3-20-6)   | 126.5 | 125.8 | 0.70  | 0.56  |
| A(3-4-23)   | 120.0 | 123.4 | -3.40 | -2.76 | A(5-4-18)   | 119.3 | 118.4 | 0.90  | 0.76  |
| A(3-20-19)  | 119.8 | 119.3 | 0.50  | 0.42  | A(4-5-20)   | 131.2 | 131.9 | -0.70 | -0.53 |
| A(22-4-23)  | 108.1 | 108.1 | 0.00  | 0.00  | A(4-5-21)   | 120.0 | 120.0 | 0.00  | 0.00  |
| A(4-22-5)   | 101.6 | 102.8 | -1.20 | -1.17 | A(4-18-17)  | 118.4 | 119.6 | -1.20 | -1.00 |
| A(4-23-7)   | 110.8 | 110.5 | 0.30  | 0.27  | A(20-5-21)  | 108.2 | 108.1 | 0.10  | 0.09  |
| A(4-23-24)  | 127.0 | 126.0 | 1.00  | 0.79  | A(5-20-6)   | 101.6 | 103.0 | -1.40 | -1.36 |
| A(7-5-22)   | 115.3 | 114.3 | 1.00  | 0.87  | A(5-21-7)   | 110.7 | 110.6 | 0.10  | 0.09  |
| A(5-7-23)   | 104.2 | 104.3 | -0.10 | -0.10 | A(5-21-22)  | 127.0 | 125.4 | 1.60  | 1.28  |
| A(7-23-24)  | 122.2 | 123.5 | -1.30 | -1.05 | A(7-6-20)   | 115.3 | 114.0 | 1.30  | 1.14  |
| A(24-8-36)  | 109.4 | 108.6 | 0.80  | 0.74  | A(6-7-21)   | 104.3 | 104.3 | 0.00  | 0.00  |
| A(8-24-23)  | 117.5 | 118.0 | -0.50 | -0.42 | A(7-21-22)  | 122.3 | 124.0 | -1.70 | -1.37 |
| A(8-24-25)  | 109.1 | 110.1 | -1.00 | -0.91 | A(22-8-34)  | 109.4 | 108.6 | 0.80  | 0.74  |
| A(8-36-27)  | 107.4 | 107.8 | -0.40 | -0.37 | A(8-22-21)  | 117.5 | 118.5 | -1.00 | -0.84 |
| A(8-36-34)  | 130.4 | 129.5 | 0.90  | 0.69  | A(8-22-23)  | 109.1 | 109.5 | -0.40 | -0.37 |
| A(12-10-19) | 120.6 | 120.4 | 0.20  | 0.17  | A(8-34-25)  | 107.4 | 108.1 | -0.70 | -0.65 |
| A(10-12-14) | 119.3 | 118.8 | 0.50  | 0.42  | A(8-34-32)  | 130.5 | 129.4 | 1.10  | 0.85  |
| A(10-19-17) | 118.9 | 119.4 | -0.50 | -0.42 | A(10-9-17)  | 121.7 | 122.1 | -0.40 | -0.33 |
| A(10-19-20) | 122.5 | 120.7 | 1.80  | 1.49  | A(9-10-12)  | 118.9 | 118.0 | 0.90  | 0.76  |
| A(12-14-15) | 121.3 | 122.6 | -1.30 | -1.06 | A(9-17-15)  | 117.3 | 117.6 | -0.30 | -0.26 |
| A(14-15-17) | 119.0 | 118.0 | 1.00  | 0.85  | A(9-17-18)  | 121.7 | 120.3 | 1.40  | 1.16  |
| A(15-17-19) | 120.9 | 120.8 | 0.10  | 0.08  | A(10-12-13) | 121.2 | 122.3 | -1.10 | -0.90 |
| A(17-19-20) | 118.6 | 119.8 | -1.20 | -1.00 | A(12-13-15) | 118.8 | 118.5 | 0.30  | 0.25  |
| A(23-24-25) | 133.4 | 131.8 | 1.60  | 1.21  | A(13-15-17) | 122.0 | 121.6 | 0.40  | 0.33  |
| A(24-25-27) | 107.0 | 106.6 | 0.40  | 0.38  | A(15-17-18) | 120.9 | 122.0 | -1.10 | -0.90 |
| A(25-27-28) | 133.9 | 134.4 | -0.50 | -0.37 | A(21-22-23) | 133.4 | 131.9 | 1.50  | 1.14  |
| A(25-27-36) | 107.1 | 106.9 | 0.20  | 0.19  | A(22-23-25) | 107.0 | 106.9 | 0.10  | 0.09  |
| A(28-27-36) | 119.0 | 118.7 | 0.30  | 0.25  | A(23-25-26) | 133.9 | 134.0 | -0.10 | -0.07 |

|             |       |       |       |       |             |       |       |       |       |
|-------------|-------|-------|-------|-------|-------------|-------|-------|-------|-------|
| A(27-28-30) | 118.9 | 118.5 | 0.40  | 0.34  | A(23-25-34) | 107.1 | 106.9 | 0.20  | 0.19  |
| A(27-36-34) | 122.2 | 122.6 | -0.40 | -0.33 | A(26-25-34) | 119.0 | 119.1 | -0.10 | -0.08 |
| A(28-30-31) | 119.7 | 119.3 | 0.40  | 0.34  | A(25-26-28) | 118.9 | 118.4 | 0.50  | 0.42  |
| A(28-30-32) | 121.1 | 121.4 | -0.30 | -0.25 | A(25-34-32) | 122.2 | 122.5 | -0.30 | -0.24 |
| A(30-32-34) | 121.5 | 121.8 | -0.30 | -0.25 |             |       |       |       |       |
| A(32-34-36) | 117.3 | 117.0 | 0.30  | 0.26  |             |       |       |       |       |

<sup>a</sup>Atom numbering refer to Fig. 7.

<sup>b</sup>The difference between the calculated ( $X_{\text{calc.}}$ ) and experimental ( $X_{\text{exp.}}$ ) value ( $X_{\text{calc.}} - X_{\text{exp.}}$ ).

<sup>c</sup>Percentage relative error.

**Table S2.** The calculated natural charges of 3 and 4<sup>a</sup>.

| Atom | Charge   | Atom | Charge   |
|------|----------|------|----------|
| 3    |          | 4    |          |
| Br1  | 0.0724   | Cl 1 | 0.02396  |
| S2   | -0.2182  | Cl 2 | 0.01952  |
| N3   | -0.28757 | S 3  | -0.20247 |
| N4   | -0.2253  | N 4  | -0.28372 |
| N5   | -0.3925  | N 5  | -0.22405 |
| H6   | 0.46062  | N 6  | -0.39317 |
| N7   | -0.30345 | N 7  | -0.30209 |
| N8   | -0.54673 | N 8  | -0.54655 |
| H9   | 0.45155  | C 9  | -0.00384 |
| C10  | -0.18601 | C10  | -0.26532 |
| H11  | 0.26043  | H11  | 0.27582  |
| C12  | -0.24749 | C12  | -0.02404 |
| H13  | 0.26158  | C13  | -0.25304 |
| C14  | -0.09829 | H14  | 0.26413  |
| C15  | -0.24955 | C15  | -0.17679 |
| H16  | 0.26227  | H16  | 0.26712  |
| C17  | -0.1895  | C17  | -0.1282  |
| H18  | 0.25179  | C18  | 0.07898  |
| C19  | -0.11281 | H19  | 0.25164  |
| C20  | 0.08633  | C20  | 0.16683  |
| H21  | 0.23802  | C21  | 0.37065  |
| C22  | 0.17028  | C22  | 0.09575  |
| C23  | 0.37069  | C23  | -0.24913 |
| C24  | 0.0962   | H24  | 0.26212  |
| C25  | -0.24845 | C25  | -0.10226 |
| H26  | 0.26216  | C26  | -0.21113 |
| C27  | -0.10219 | H27  | 0.24092  |
| C28  | -0.2111  | C28  | -0.25999 |
| H29  | 0.24091  | H29  | 0.24113  |
| C30  | -0.26026 | C30  | -0.23062 |
| H31  | 0.2409   | H31  | 0.24157  |
| C32  | -0.23103 | C32  | -0.27099 |
| H33  | 0.2413   | H33  | 0.24169  |
| C34  | -0.27114 | C34  | 0.17287  |
| H35  | 0.24142  | H35  | 0.45176  |
| C36  | 0.1727   | H36  | 0.46096  |

<sup>a</sup>Atom numbering refer to Fig. 7.

$^1\text{H}$  NMR and  $^{13}\text{C}$  NMR of the Schiff bases 3–6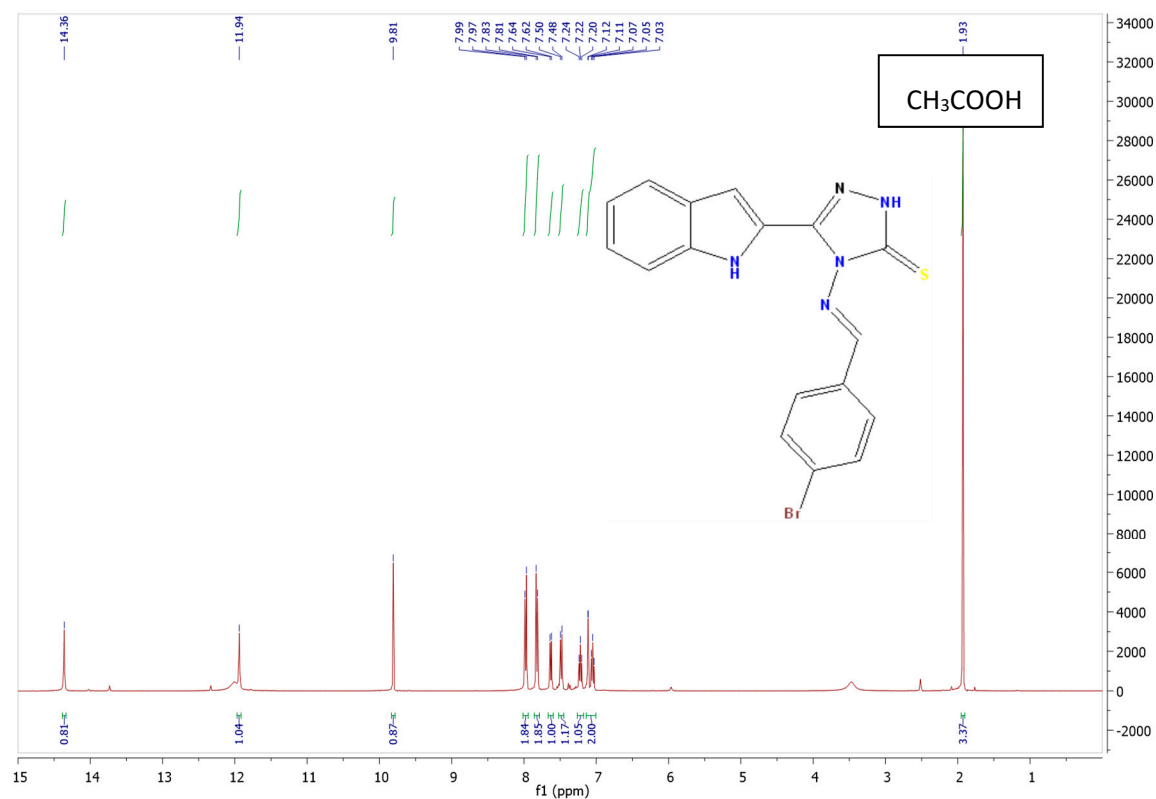Figure S1.  $^1\text{H}$  NMR of 3 in  $\text{DMSO}-d_6$ .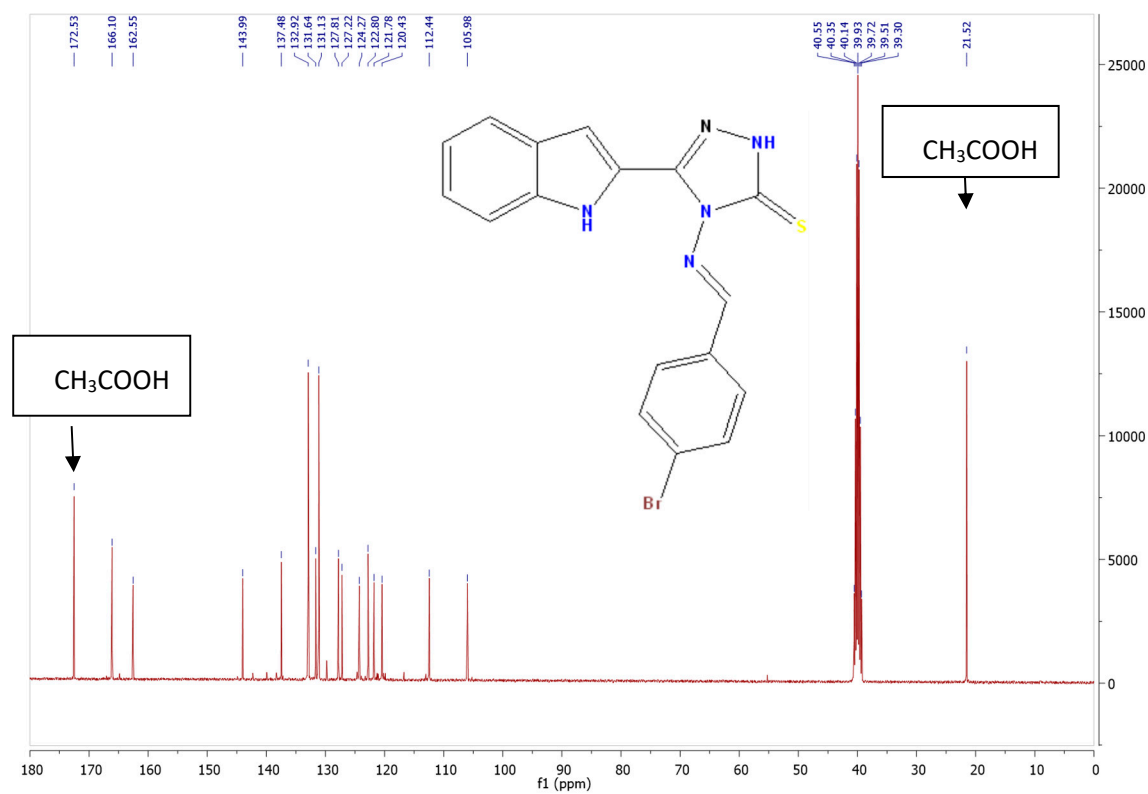Figure S2.  $^{13}\text{C}$  NMR of 3 in  $\text{DMSO}-d_6$ .

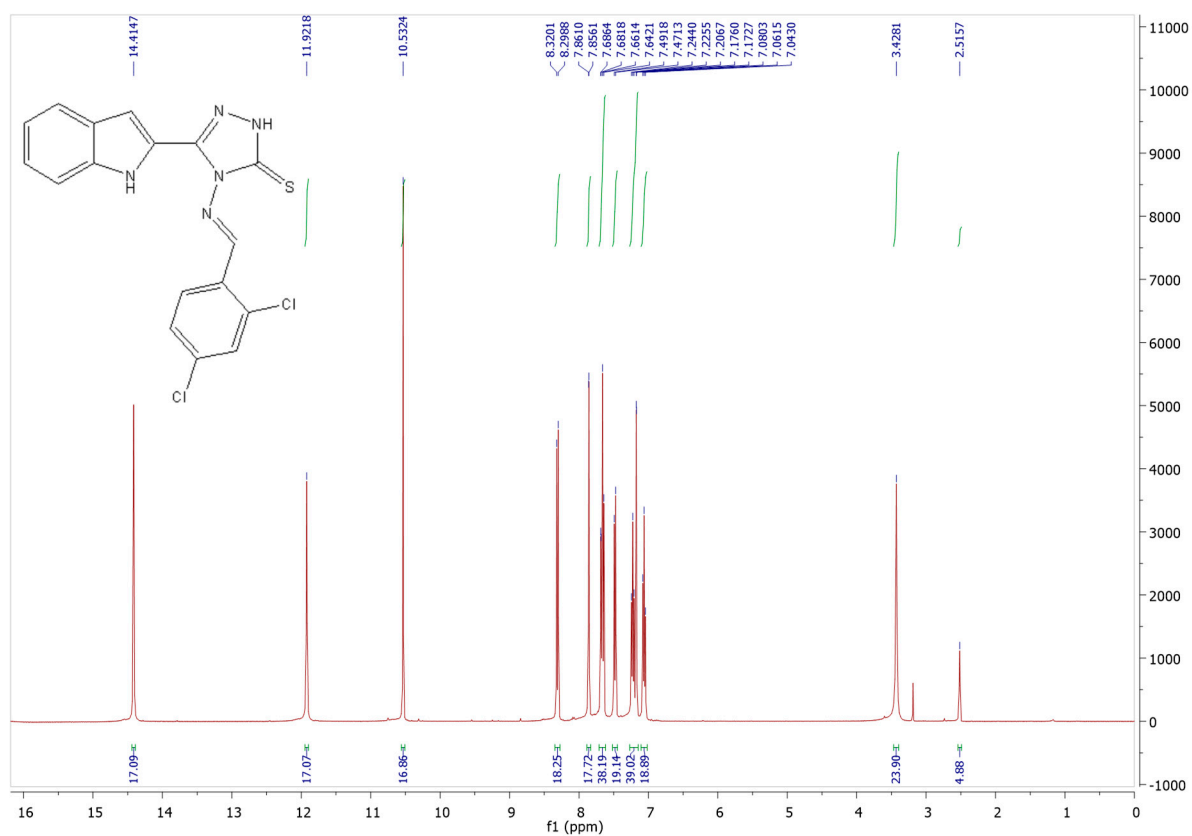

Figure S3. <sup>1</sup>H NMR of 4 in DMSO-*d*<sub>6</sub>.

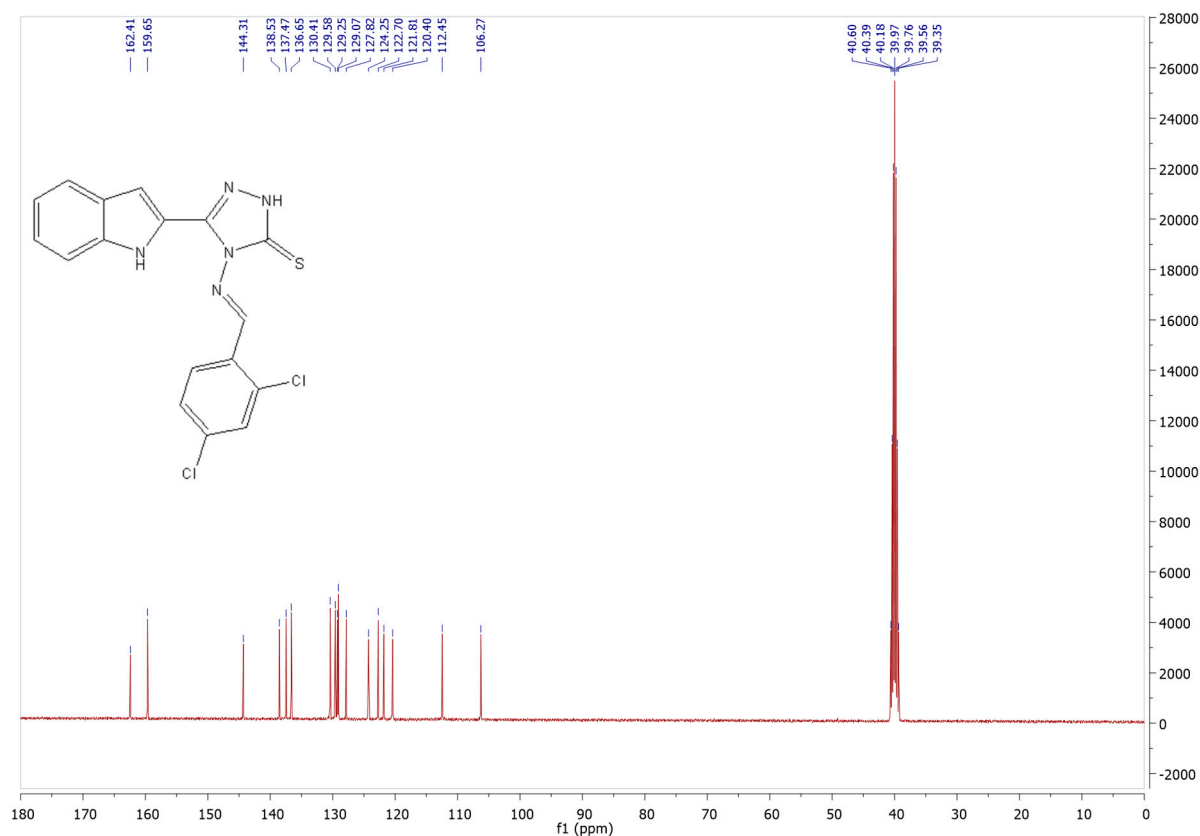

Figure S4. <sup>13</sup>C NMR of 4 in DMSO-*d*<sub>6</sub>.

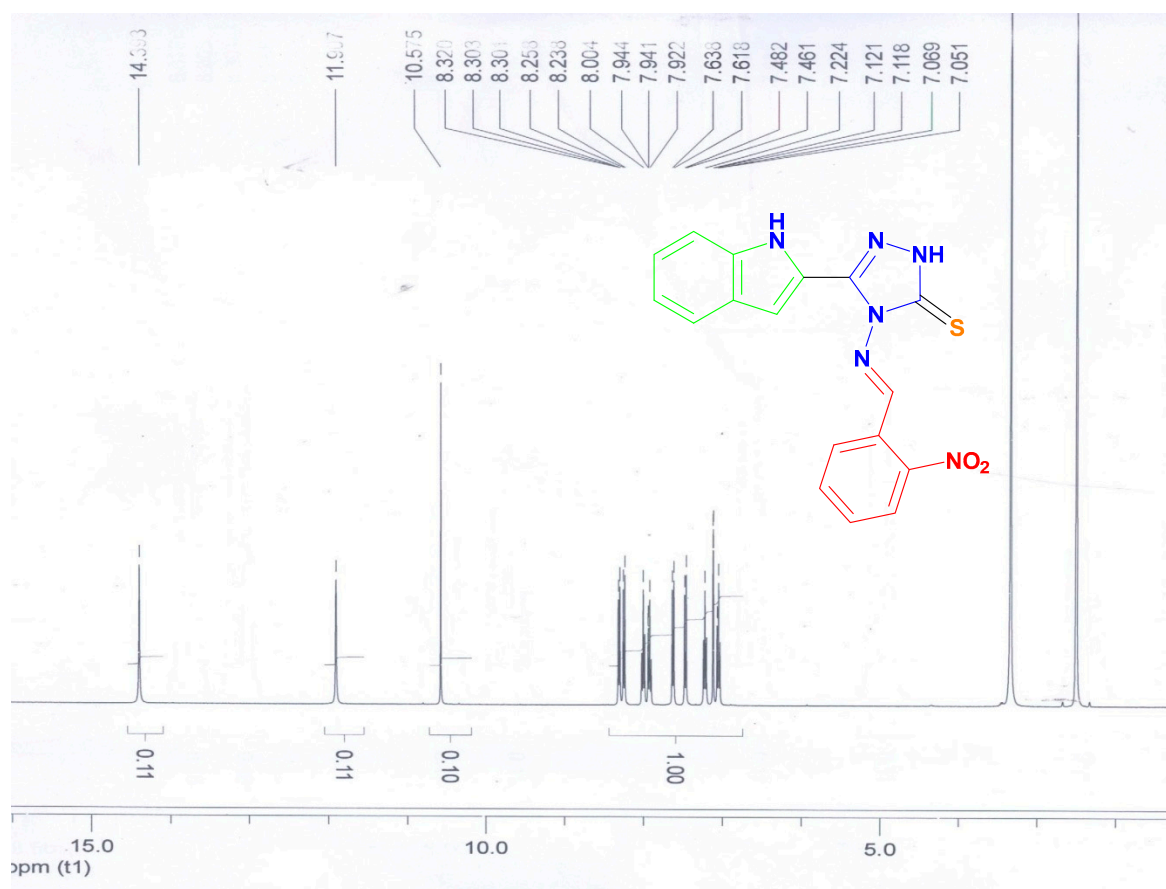

Figure S5. <sup>1</sup>H NMR of 5 in DMSO-*d*<sub>6</sub>.

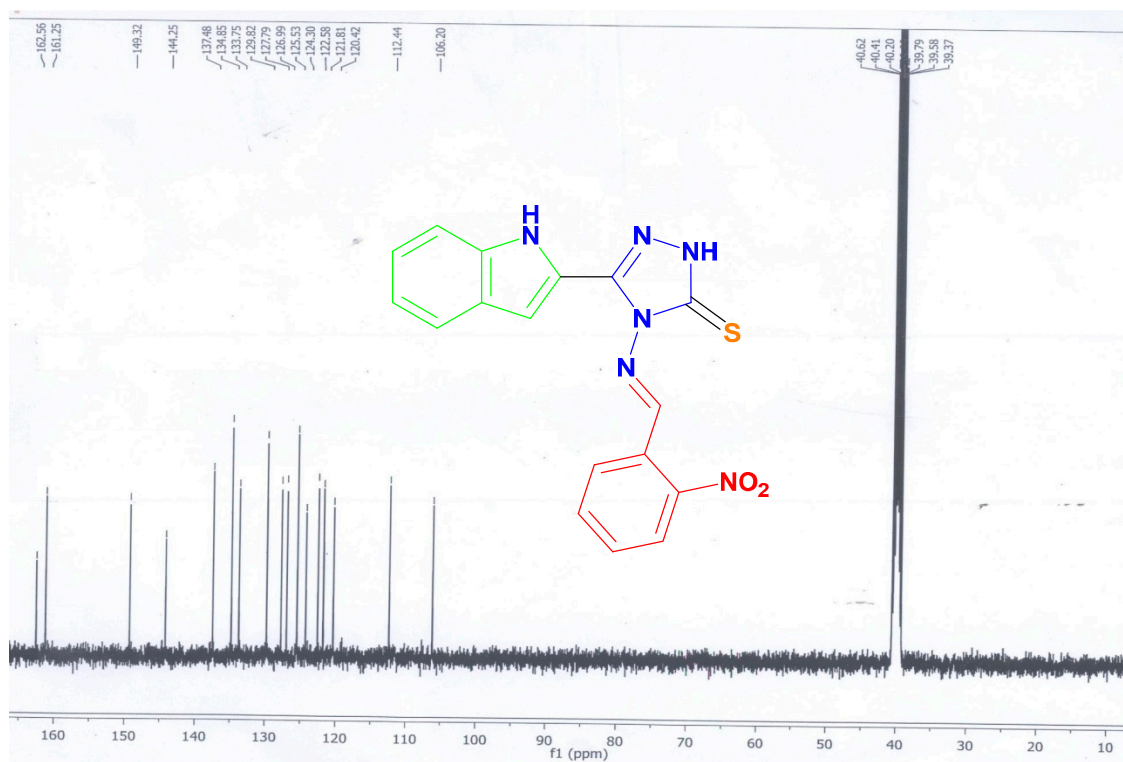

Figure S6. <sup>13</sup>C NMR of 5 in DMSO-*d*<sub>6</sub>.

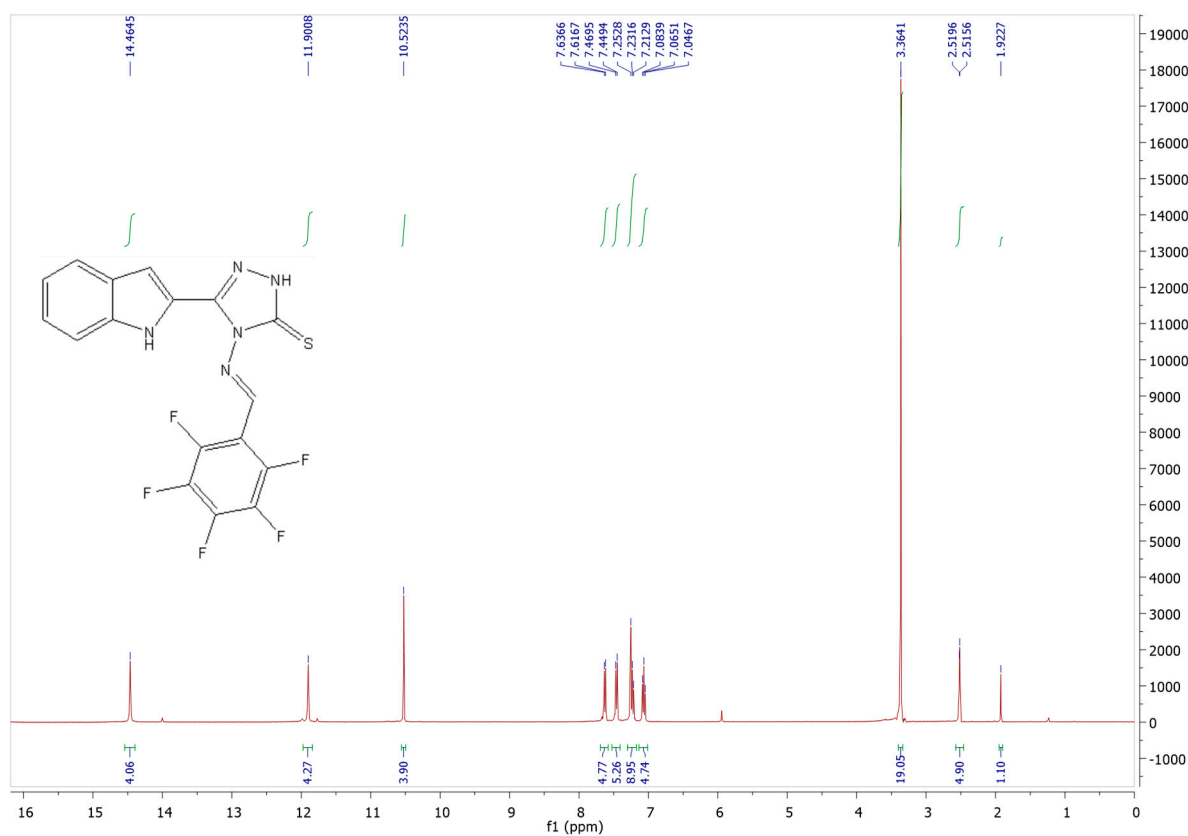Figure S7. <sup>1</sup>H NMR of 6 in DMSO-*d*<sub>6</sub>.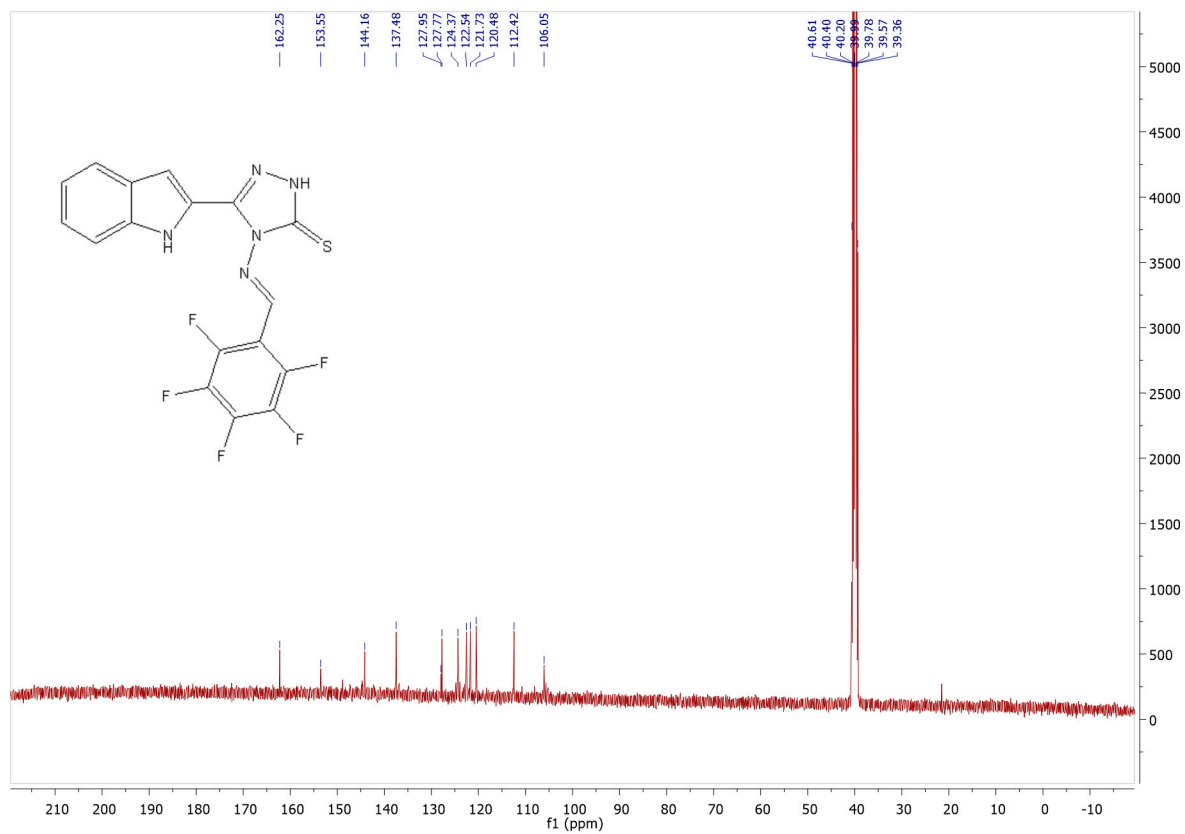Figure S8. <sup>13</sup>C NMR of 6 in DMSO-*d*<sub>6</sub>.

## References

1. Rikagu Oxford Diffraction, *CrysAlisPro*, Agilent Technologies inc., 2018, Yarnton, Oxfordshire, England.
1. Sheldrick, G. M. SHELXT—Integrated space-group and crystal-structure determination, *Acta Cryst.* **2015**, *A71*, 3–8.
2. Sheldrick, G. M. Crystal structure refinement with SHELXL. *Acta Cryst.* **2015**, *C71*, 3–8.
3. Hübschle, C. B.; Sheldrick, G. M.; Dittrich, B. ShelXle: a Qt graphical user interface for SHELXL, *J. Appl. Cryst.* **2011**, *44*, 1281–1284.
